# Supplementary material for: Characteristics associated with Lactobacillus iners-dominated vaginal microbiota
Source: HighWire-hosted journal article supplement (doi:10.1136/sextrans-2020-054824), 2021-09-08
Supplement: sextrans-2020-054824supp001_data_supplement.pdf [file sextrans-2020-054824supp001_data_supplement.pdf]

**Introdução:** O papel protetor do *Lactobacillus iners* para a microbiota vaginal tem sido questionado e a microbiota dominada por esta espécie apresenta alta taxa de prevalência ao redor do mundo. Neste sentido, o objetivo deste estudo foi identificar variáveis sociodemográficas, comportamentais e clínicas associadas a comunidade com predomínio de *L. iners* (CST III) em mulheres brasileiras de idade reprodutiva.

**Participantes e métodos:** Este estudo utilizou os dados de composição da microbiota gerados pelo sequenciamento das regiões V3-V4 do gene rRNA 16S de amostras vaginais coletadas de 442 participantes inscritas em um estudo transversal anterior que incluiu 609 mulheres em cinco regiões geográficas do Brasil. Participantes que não apresentaram microbiota dominada por *Lactobacillus sp.* (n=167, 27,4%) não foram incluídas nas análises estatísticas do presente estudo. Os dados sobre as características sociodemográficas e comportamentais da população estudada foram obtidos por meio de entrevistas presenciais. As participantes foram divididas em dois grupos de estudo: aquelas com predomínio de *L. iners*, CST III, (n=222) e aquelas com predomínio de outras espécies de *Lactobacillus*, CSTs I, II e V, (n=220). Uma análise de regressão logística pelo método *stepwise* foi realizada para testar a associação entre a CST III e as características dos participantes, considerando odds ratios (OR) e intervalos de confiança de 95% (IC 95%).

**Resultados:** Entre as características populacionais avaliadas, CST III foi independentemente associada a ter dois ou mais parceiros sexuais (OR: 3,27; IC 95%: 1,50-7,11) e detecção microscópica de *Candida sp.* em esfregaços vaginais (OR: 2,24; IC 95%: 1,02-4,89). Outras características foram inversamente associadas com CST III, incluindo uso de preservativo (OR: 0,59; IC 95%: 0,38-0,91), maior nível de escolaridade (OR: 0,61; IC 95%: 0,41-0,91) e dieta contendo leite ou derivados (OR: 0,43; IC 95%: 0,20-0,90).

**Conclusão:** Práticas sexuais desprotegidas, número de parceiros sexuais e níveis educacionais mais baixos podem ser úteis para identificar mulheres com microbiota dominada por *L. iners*. A microbiota com predomínio de *L. iners* parece não fornecer proteção ideal contra a colonização por *Candida sp.*, justificando uma investigação mais aprofundada.
